# Supplementary material
Source: PubMed Central journal article supplement (PMC2770442)

Supplemental Tables, Figures and Information on compound synthesis

This document includes Supplemental Tables 1-12; Supplemental Figures 1-7; Supplemental Information on compound synthesis

**Supplemental Table 1** Identification and quantification of CapD reaction products generated from synthetic substrate Abz- $\gamma$ -D-Glu<sub>10</sub>-Dnp (as shown on **Fig. 3b**). Products were separated by rpHPLC using acetonitrile gradient. Compounds were recovered from HPLC fractions and subjected to MALDI-TOF MS analysis in positive and negative reflectron mode. Absorbance peak areas from HPLC chromatogram were integrated to determine the relative abundance of identified compounds (32 Karat Software Package, Beckman Coulter, Inc.).

| Reaction             | Retention (min) | Area (%) | [M+H] <sup>+</sup> |            | [M-H] <sup>-</sup> |            | Predicted structure                    |
|----------------------|-----------------|----------|--------------------|------------|--------------------|------------|----------------------------------------|
|                      |                 |          | observed           | calculated | observed           | calculated |                                        |
| Hydrolysis           | 35-41           | 10.2%    | 654.14             | 654.20     | 652.28             | 652.20     | Abz- $\gamma$ -D-Glu <sub>4</sub>      |
|                      |                 |          | n. d.              | 783.24     | 781.33             | 781.24     | Abz- $\gamma$ -D-Glu <sub>5</sub>      |
|                      |                 |          | n. d.              | 912.28     | 910.38             | 910.28     | Abz- $\gamma$ -D-Glu <sub>6</sub>      |
|                      |                 |          | 1041.50            | 1041.32    | 1039.41            | 1039.32    | Abz- $\gamma$ -D-Glu <sub>7</sub>      |
|                      |                 |          | n. d.              | 1170.36    | 1168.43            | 1168.36    | Abz- $\gamma$ -D-Glu <sub>8</sub>      |
|                      | 46-48           | 32.2%    | 399.06             | 399.11     | n. d.              | 397.11     | $\gamma$ -D-Glu-Dnp                    |
|                      |                 |          | 528.09             | 528.15     | 526.23             | 526.15     | $\gamma$ -D-Glu <sub>2</sub> -Dnp      |
|                      |                 |          | 657.13             | 657.19     | 655.27             | 655.19     | $\gamma$ -D-Glu <sub>3</sub> -Dnp      |
|                      |                 |          | 786.16             | 786.23     | 784.32             | 784.23     | $\gamma$ -D-Glu <sub>4</sub> -Dnp      |
|                      |                 |          | 915.20             | 915.27     | 913.36             | 913.27     | $\gamma$ -D-Glu <sub>5</sub> -Dnp      |
|                      |                 |          | 1044.24            | 1044.31    | 1042.39            | 1042.31    | $\gamma$ -D-Glu <sub>6</sub> -Dnp      |
|                      |                 |          | 1173.28            | 1173.35    | 1171.43            | 1171.35    | $\gamma$ -D-Glu <sub>7</sub> -Dnp      |
|                      |                 |          | 1302.33            | 1302.39    | 1300.47            | 1300.39    | $\gamma$ -D-Glu <sub>8</sub> -Dnp      |
|                      |                 |          | n. d.              | 1431.43    | 1429.50            | 1429.43    | $\gamma$ -D-Glu <sub>9</sub> -Dnp      |
|                      |                 |          | Substrate*         | 49         | >1%                | n. d.      | 1679.51                                |
| Autotranspeptidation | 50-54           | 57.6%    | n. d.              | 647.19     | 645.26             | 645.19     | Abz- $\gamma$ -D-Glu <sub>2</sub> -Dnp |
|                      |                 |          | n. d.              | 776.23     | 774.31             | 774.23     | Abz- $\gamma$ -D-Glu <sub>3</sub> -Dnp |
|                      |                 |          | 905.15             | 905.27     | 903.35             | 903.27     | Abz- $\gamma$ -D-Glu <sub>4</sub> -Dnp |
|                      |                 |          | 1034.19            | 1034.31    | 1032.39            | 1032.31    | Abz- $\gamma$ -D-Glu <sub>5</sub> -Dnp |
|                      |                 |          | 1163.23            | 1163.35    | 1161.43            | 1161.35    | Abz- $\gamma$ -D-Glu <sub>6</sub> -Dnp |
|                      |                 |          | 1292.30            | 1292.39    | 1290.47            | 1290.39    | Abz- $\gamma$ -D-Glu <sub>7</sub> -Dnp |
|                      |                 |          | 1421.34            | 1421.43    | 1419.51            | 1419.43    | Abz- $\gamma$ -D-Glu <sub>8</sub> -Dnp |
|                      |                 |          | n. d.              | 1550.47    | 1548.55            | 1548.47    | Abz- $\gamma$ -D-Glu <sub>9</sub> -Dnp |

n. d. Not detected

\* The substrate did not form a distinct absorbance peak during HPLC. The compound was detected by MALDI-TOF MS. Non-cleaved substrate represents less than 1% of all compounds detected after CapD assay (see **Fig. 3c** and **Supplemental Table 2**).

**Supplemental Table 2** Identification and quantification of CapD reaction products generated from Abz- $\gamma$ -D-Glu<sub>10</sub>-Dnp in presence of cell wall tripeptide L-Ala- $\gamma$ -D-Glu-*m*-DAP (as shown on **Fig. 3c**). Products were separated by rpHPLC using acetonitrile gradient. Compounds were recovered from HPLC fractions and subjected to MALDI-TOF MS analysis in positive and negative reflectron mode. Absorbance peak areas from HPLC chromatogram were integrated to determine the relative abundance of identified compounds (32 Karat Software Package, Beckman Coulter, Inc.).

| Reaction                    | Retention (min) | Area (%)     | [M+H] <sup>+</sup> |            | [M-H] <sup>-</sup> |            | Predicted structure                                                       |
|-----------------------------|-----------------|--------------|--------------------|------------|--------------------|------------|---------------------------------------------------------------------------|
|                             |                 |              | observed           | calculated | observed           | calculated |                                                                           |
| <b>Transpeptidation</b>     | 35-41           | <b>36.4%</b> | 639.26             | 639.26     | 637.14             | 637.26     | L-Ala- $\gamma$ -D-Glu- <i>m</i> -DAP( $\gamma$ -D-Glu-Abz)               |
|                             |                 |              | 768.30             | 768.30     | 766.14             | 766.30     | L-Ala- $\gamma$ -D-Glu- <i>m</i> -DAP( $\gamma$ -D-Glu <sub>2</sub> -Abz) |
|                             |                 |              | 897.35             | 897.35     | 895.14             | 895.35     | L-Ala- $\gamma$ -D-Glu- <i>m</i> -DAP( $\gamma$ -D-Glu <sub>3</sub> -Abz) |
|                             |                 |              | 1026.40            | 1026.39    | n. d.              | 1024.39    | L-Ala- $\gamma$ -D-Glu- <i>m</i> -DAP( $\gamma$ -D-Glu <sub>4</sub> -Abz) |
| <b>Hydrolysis</b>           | 44-48           | <b>58.7%</b> | 528.08             | 528.15     | 526.22             | 526.15     | $\gamma$ -D-Glu <sub>2</sub> -Dnp                                         |
|                             |                 |              | 657.11             | 657.19     | 655.26             | 655.19     | $\gamma$ -D-Glu <sub>3</sub> -Dnp                                         |
|                             |                 |              | 786.15             | 786.23     | 784.30             | 784.23     | $\gamma$ -D-Glu <sub>4</sub> -Dnp                                         |
|                             |                 |              | 915.19             | 915.27     | 913.34             | 913.27     | $\gamma$ -D-Glu <sub>5</sub> -Dnp                                         |
|                             |                 |              | 1044.23            | 1044.31    | 1042.38            | 1042.31    | $\gamma$ -D-Glu <sub>6</sub> -Dnp                                         |
| <b>Substrate</b>            | 49              | <b>0.8%</b>  | n. d.              | 1679.51    | 1677.08            | 1677.51    | Abz- $\gamma$ -D-Glu <sub>10</sub> -Dnp                                   |
| <b>Autotranspeptidation</b> | 50-51           | <b>4.2%</b>  | 776.23             | 776.23     | 774.09             | 774.23     | Abz- $\gamma$ -D-Glu <sub>3</sub> -Dnp                                    |
|                             |                 |              | 905.15             | 905.27     | 903.34             | 903.27     | Abz- $\gamma$ -D-Glu <sub>4</sub> -Dnp                                    |
|                             |                 |              | 1034.38            | 1034.31    | 1032.36            | 1032.31    | Abz- $\gamma$ -D-Glu <sub>5</sub> -Dnp                                    |

n. d. Not detected

**Supplemental Table 3** CID daughter ions of parent ion 639.25 shown on to **Supplemental Fig. 1** and predicted structure assignments. Program ProteinProspector was used for *m/z* calculations (<http://prospector.ucsf.edu>).

| <i>Ion</i>                            | <i>Observed m/z</i> | <i>Calculated m/z</i> | <i>Predicted structure</i>                                         |
|---------------------------------------|---------------------|-----------------------|--------------------------------------------------------------------|
| [M+H]                                 | 639.26              | 639.26                | L-Ala- $\gamma$ -D-Glu- <i>m</i> -DAP(- $\gamma$ -D-Glu-Abz)       |
| <b>b4</b>                             | 502.33              | 502.21                | L-Ala- $\gamma$ -D-Glu- <i>m</i> -DAP(- $\gamma$ -D-Glu)           |
| <b>b4 +H<sub>2</sub>O</b>             | 520.36              | 520.22                |                                                                    |
| <b>b3</b>                             | 373.28              | 373.17                | L-Ala- $\gamma$ -D-Glu- <i>m</i> -DAP                              |
| <b>b3 +H<sub>2</sub>O</b>             | 391.27              | 391.18                |                                                                    |
| <b>b2</b>                             | 201.15              | 201.09                | L-Ala- $\gamma$ -D-Glu                                             |
| <b>a2</b>                             | 173.14              | 173.09                |                                                                    |
| <b>a2 +H<sub>2</sub>O</b>             | 191.15              | 191.09                |                                                                    |
| <b>y4</b>                             | 568.31              | 568.22                | $\gamma$ -D-Glu- <i>m</i> -DAP(- $\gamma$ -D-Glu-Abz)              |
| <b>y3</b>                             | 439.28              | 439.18                | <i>m</i> -DAP(- $\gamma$ -D-Glu-Abz)                               |
| <b>y3 +H<sub>2</sub>O</b>             | 457.30              | 457.18                |                                                                    |
| <b>Internal [M+H]</b>                 | 431.28              | 431.18                | $\gamma$ -D-Glu- <i>m</i> -DAP(- $\gamma$ -D-Glu)                  |
| <b>Internal [M+H] +H<sub>2</sub>O</b> | 449.29              | 449.18                |                                                                    |
| <b>Internal [M+H]</b>                 | 302.22              | 302.13                | $\gamma$ -D-Glu- <i>m</i> -DAP or <i>m</i> -DAP(- $\gamma$ -D-Glu) |
| <b>Internal [M+H] +H<sub>2</sub>O</b> | 320.22              | 320.13                |                                                                    |

**Supplemental Table 4** CID daughter ions of parent ion 1009.47 with predicted structure assignments. Programs ChemDraw (CambridgeSoft) and ProteinProspector (<http://prospector.ucsf.edu>) were used for *m/z* calculations. The compound was identified following the rpHPLC analysis of CapD treated and mutanolysin (muramidase) cleaved murein sacculi isolated from *B. anthracis* Ames (**Supplemental Fig. 2**) as well as in isolated capsular material [**Fig. 5c** (PDGA)] following treatment with CapD (**Fig. 5d**).

**Compound *m/z* 1009.47**

| <i>m/z</i>              | Observed | Calculated | Predicted structure                                |
|-------------------------|----------|------------|----------------------------------------------------|
| [M+H] -H <sub>2</sub> O | 1009.47  | 1009.41    | GA-MN-L-Ala-γ-D-Glu- <i>m</i> -DAP(-γ-D-Glu)-D-Ala |
| y6                      | 848.52   | 848.34     | MN-L-Ala-γ-D-Glu- <i>m</i> -DAP(-γ-D-Glu)-D-Ala    |
| y6'                     | 645.42   | 645.27     | Lac-L-Ala-γ-D-Glu- <i>m</i> -DAP(-γ-D-Glu)-D-Ala   |
| y4                      | 502.34   | 502.21     | γ-D-Glu- <i>m</i> -DAP(-γ-D-Glu)-D-Ala             |
| y3                      | 373.29   | 373.17     | <i>m</i> -DAP(-γ-D-Glu)-D-Ala                      |
| Intern [M+H]            | 485.40   | 484.20     | L-Ala-γ-D-Glu- <i>m</i> -DAP(-γ-D-Glu)             |
| Intern [M+H]            | 301.22   | 301.12     | γ-D-Glu- <i>m</i> -DAP                             |

**Supplemental Table 5** CID daughter ions of parent ion 1051.42 with predicted structure assignments. Programs ChemDraw (CambridgeSoft) and ProteinProspector (<http://prospector.ucsf.edu>) were used for *m/z* calculations. The compound was identified following the rpHPLC analysis of CapD treated and mutanolysin (muramidase) cleaved murein sacculi isolated from *B. anthracis* Ames (**Supplemental Fig. 2**) as well as in isolated capsular material [**Fig. 5c** (PDGA)] following treatment with CapD (**Fig. 5d**).

**Compound *m/z* 1051.53**

| <i>m/z</i>              | Observed | Calculated | Predicted structure                                                  |
|-------------------------|----------|------------|----------------------------------------------------------------------|
| [M+H] -H <sub>2</sub> O | 1051.53  | 1051.42    | GN-MN-L-Ala- $\gamma$ -D-Glu- <i>m</i> -DAP(- $\gamma$ -D-Glu)-D-Ala |
| y6                      | 848.56   | 848.34     | MN-L-Ala- $\gamma$ -D-Glu- <i>m</i> -DAP(- $\gamma$ -D-Glu)-D-Ala    |
| y6'                     | 645.45   | 645.27     | Lac-L-Ala- $\gamma$ -D-Glu- <i>m</i> -DAP(- $\gamma$ -D-Glu)-D-Ala   |
| y4                      | 502.36   | 502.21     | $\gamma$ -D-Glu- <i>m</i> -DAP(- $\gamma$ -D-Glu)-D-Ala              |
| y3                      | 373.32   | 373.17     | <i>m</i> -DAP(- $\gamma$ -D-Glu)-D-Ala                               |
| Intern [M+H]            | 301.21   | 301.12     | $\gamma$ -D-Glu- <i>m</i> -DAP                                       |

**Supplemental Table 6** CID daughter ions of parent ion 645.34 with predicted structure assignments. Programs ChemDraw (CambridgeSoft) and ProteinProspector (<http://prospector.ucsf.edu>) were used for *m/z* calculations. The compound was identified following the rpHPLC analysis of CapD treated and mutanolysin (muramidase) cleaved murein sacculi isolated from *B. anthracis* Ames (**Supplemental Fig. 2**) as well as in isolated capsular material [**Fig. 5c** (PDGA)] following treatment with CapD (**Fig. 5d**).

**Compound *m/z* 645.34**

| <i>m/z</i>              | Observed | Calculated | Predicted structure                              |
|-------------------------|----------|------------|--------------------------------------------------|
| [M+H] -H <sub>2</sub> O | 645.34   | 645.27     | Lac-L-Ala-γ-D-Glu- <i>m</i> -DAP(-γ-D-Glu)-D-Ala |
| b3 -H <sub>2</sub> O    | 257.25   | 257.11     | Lac-L-Ala-γ-D-Glu                                |
| y5                      | 573.44   | 573.25     | L-Ala-γ-D-Glu- <i>m</i> -DAP(-γ-D-Glu)-D-Ala     |
| y4                      | 502.38   | 502.21     | γ-D-Glu- <i>m</i> -DAP(-γ-D-Glu)-D-Ala           |
| y3                      | 373.32   | 373.17     | <i>m</i> -DAP(-γ-D-Glu)-D-Ala                    |
| Intern [M+H]            | 301.22   | 301.12     | γ-D-Glu- <i>m</i> -DAP                           |

**Supplemental Table 7** Predicted peptidoglycan subunits isolated from encapsulated *B. anthracis* Ames cells. Compounds were separated by rpHPLC (as shown on **Fig. 5c**) using a methanol gradient in sodium phosphate buffer and desalted before MALDI-TOF MS analysis in positive and negative reflectron mode. Amino acid analysis was carried out by ion-exchange HPLC following acidic hydrolysis.

| Retention (min) | [M+Na] <sup>+</sup> |            | [M+H] <sup>+</sup> |            | [M-H] <sup>-</sup> |            | Predicted structure                                                                        |
|-----------------|---------------------|------------|--------------------|------------|--------------------|------------|--------------------------------------------------------------------------------------------|
|                 | observed            | calculated | observed           | calculated | observed           | calculated |                                                                                            |
| 18              | 848.41              | 848.36     | -                  | 826.36     | 824.19             | 824.36     | GA-MN-L-Ala-γ-D-iGln- <i>m</i> -DAP <sup>3)</sup>                                          |
| 20              | 890.41              | 890.37     | -                  | 868.37     | 866.17             | 866.37     | GN-MN-L-Ala-γ-D-iGln- <i>m</i> -DAP                                                        |
| 29              | 919.44              | 919.40     | 897.46             | 897.40     | 895.19             | 895.40     | GN-MN-L-Ala-γ-D-iGln- <i>m</i> -DAP-D-Ala <sup>3)</sup>                                    |
| 33              | 961.46              | 961.41     | -                  | 939.41     | 937.19             | 937.41     | GA-MN-L-Ala-γ-D-iGln- <i>m</i> -DAP-D-Ala                                                  |
| 34              | 677.28              | 677.26     | -                  | 655.26     | 653.13             | 653.26     | GA-MN-L-Ala-γ-D-iGlu                                                                       |
| 35              | 719.34              | 719.27     | -                  | 697.27     | 695.20             | 695.27     | GN-MN-L-Ala-γ-D-iGlu                                                                       |
| 36              | 1032.52             | 1032.45    | -                  | 1010.45    | 1008.30            | 1008.45    | GN-MN-L-Ala-γ-D-iGln- <i>m</i> -DAP-D-Ala-D-Ala                                            |
| 39-40 (a)       | 1362.61             | 1362.60    | -                  | 1340.60    | 1338.24            | 1338.60    | Lac-L-Ala-γ-D-iGln- <i>m</i> -DAP-D-Ala(GA-MN-L-Ala-γ-D-iGln- <i>m</i> -DAP) <sup>3)</sup> |
| 39-40 (b)       | 1404.64             | 1404.61    | -                  | 1382.61    | 1380.26            | 1380.61    | Lac-L-Ala-γ-D-iGln- <i>m</i> -DAP-D-Ala(GN-MN-L-Ala-γ-D-iGln- <i>m</i> -DAP)               |
| 39-40 (c)       | 1726.78             | 1726.76    | -                  | 1704.76    | 1702.28            | 1702.76    | GA-MN-L-Ala-γ-D-iGln- <i>m</i> -DAP-D-Ala(GA-MN-L-Ala-γ-D-iGln- <i>m</i> -DAP)             |
| 43-60 (a)       | -                   | 1474.65    | 1452.77            | 1452.65    | -                  | 1450.65    | Lac-L-Ala-γ-D-iGln- <i>m</i> -DAP-D-Ala(GN-MN-L-Ala-γ-D-iGln- <i>m</i> -DAP-D-Ala)         |
| 43-60 (b)       | -                   | 1545.69    | 1523.81            | 1523.69    | -                  | 1521.69    | Lac-L-Ala-γ-D-iGln- <i>m</i> -DAP-D-Ala(GN-MN-L-Ala-γ-D-iGln- <i>m</i> -DAP-D-Ala-D-Ala)   |
| 43-60 (c)       | -                   | 1838.81    | 1816.93            | 1816.81    | -                  | 1814.81    | GA-MN-L-Ala-γ-D-iGln- <i>m</i> -DAP-D-Ala(GN-MN-L-Ala-γ-D-iGln- <i>m</i> -DAP-D-Ala)       |
| 43-60 (d)       | -                   | 1909.85    | 1887.98            | 1887.85    | 1885.32            | 1885.85    | GA-MN-L-Ala-γ-D-iGln- <i>m</i> -DAP-D-Ala(GN-MN-L-Ala-γ-D-iGln- <i>m</i> -DAP-D-Ala-D-Ala) |
| 43-60 (d)       | -                   | 1951.86    | 1929.99            | 1929.86    | -                  | 1927.86    | GN-MN-L-Ala-γ-D-iGln- <i>m</i> -DAP-D-Ala(GN-MN-L-Ala-γ-D-iGln- <i>m</i> -DAP-D-Ala-D-Ala) |

<sup>1)</sup> HPLC fractions are identified by retention time. Collected fractions above 36 min were pooled as indicated and desalted by a second HPLC separation. Individual peaks recovered from the second HPLC are labeled with letters in parenthesis.

<sup>2)</sup> Abbreviations: GA, glucosamine; GN, *N*-acetylglucosamine; iGln, iso-glutamine; iGlu, iso-glutamate; Lac, lactoyl moiety generated during MALDI-TOF MS by cleavage of ether bond internal to *N*-acetylmuramic acid; *m*-DAP, *meso*-diaminopimelic acid; MN, *N*-acetylmuramic acid

<sup>3)</sup> Structure confirmed by amino acid composition analysis

**Supplemental Table 8** PDGA fragments identified after CapD treatment of material recovered from rpHPLC peak 93-96 min (as shown on **Fig. 5d**). Compounds were separated by rpHPLC using methanol gradient in sodium phosphate buffer and desalted before MALDI-TOF MS analysis in negative reflectron mode.

| <b>[M-H]<sup>-</sup> observed*</b> | <b>[M-H]<sup>-</sup> calculated</b> | <b>Glu residues</b> |
|------------------------------------|-------------------------------------|---------------------|
| 662.13                             | 662.20                              | 5                   |
| 791.13                             | 791.24                              | 6                   |
| 920.13                             | 920.28                              | 7                   |
| 1049.11                            | 1049.32                             | 8                   |
| 1178.12                            | 1178.36                             | 9                   |
| 1307.12                            | 1307.40                             | 10                  |
| 1436.10                            | 1436.44                             | 11                  |
| 1565.10                            | 1565.48                             | 12                  |
| 1694.10                            | 1694.52                             | 13                  |
| 1823.15                            | 1823.56                             | 14                  |
| 1952.16                            | 1952.60                             | 15                  |
| 2081.17                            | 2081.64                             | 16                  |
| 2210.32                            | 2210.68                             | 17                  |
| 2339.31                            | 2339.72                             | 18                  |
| 2468.27                            | 2468.76                             | 19                  |
| 2597.28                            | 2597.80                             | 20                  |
| 2726.35                            | 2726.84                             | 21                  |
| 2855.35                            | 2855.88                             | 22                  |

\* All compounds were detected as regular deprotonated mass ions [M-H]<sup>-</sup> and as water-loss deprotonated mass ions (not shown).



**Supplemental Table 9** Substrate specificity of CapD and GGT. Standard assay conditions were used to test enzyme activity for the respective substrates (see **Fig. 6**).

| Substrate                                  | Test concentration      | Activity |     |
|--------------------------------------------|-------------------------|----------|-----|
|                                            |                         | CapD     | GGT |
| $\gamma$ -glutamyl- <i>p</i> -nitroanilide | 100 $\mu$ M             | -        | +   |
| $\gamma$ -D-polyglutamate                  | 1 mg x mL <sup>-1</sup> | +        | -   |
| Abz- $\gamma$ -D-Glu <sub>5</sub> -Dnp     | 10 $\mu$ M              | +        | -   |

**Supplemental Table 10** Molecular weight determination of CapD small subunit and capsidin after incubation using electrospray ionization mass spectrometry (ESMS) following rpHPLC. The mass spectrometry analysis was carried out by the Research Resources Center at the University of Illinois in Chicago.

| Protein/compound   | Incubation | Average mass ( <i>m</i> ) |                    |
|--------------------|------------|---------------------------|--------------------|
|                    |            | observed                  | calculated         |
| CapD small subunit | – Capsidin | 19,522.2                  | 19,521.9           |
|                    | + Capsidin | 19,564.2                  | 19563.9            |
| Mass difference    | ± Capsidin | $\Delta m = 42.0$         | $\Delta m = 42.0$  |
| Capsidin           | – CapD     | 407.9                     | 408.27             |
|                    | + CapD     | 366.0                     | 366.24             |
| Mass difference    | ± CapD     | $\Delta m = 41.9$         | $\Delta m = 42.03$ |

**Supplemental Table 11** CID daughter ions of parent ion 1101.48 with structure assignments predicted using program ProteinProspector (<http://prospector.ucsf.edu>). Compound fragment ions were identified by tandem mass spectrometry following the rpHPLC analysis of trypsin cleaved CapD.

**Compound  $m/z$  1101.48**

| $m/z$                | Observed | Calculated | Predicted structure |
|----------------------|----------|------------|---------------------|
| [M+H]                | 1101.48  | 1101.61    | TTHFVIIDR           |
| b8                   | 927.78   | 927.49     | TTHFVIID            |
| b7                   | 812.70   | 812.47     | TTHFVII             |
| b6                   | 699.59   | 699.38     | TTHFVI              |
| b5                   | 586.47   | 586.30     | TTHFV               |
| b4                   | 487.37   | 487.23     | TTHF                |
| b3                   | 340.28   | 340.16     | TTH                 |
| b2                   | 203.20   | 203.10     | TT                  |
| y8                   | 1000.93  | 1000.56    | THFVIIDR            |
| y7                   | 899.81   | 899.51     | HFVIIDR             |
| y6                   | 762.68   | 762.45     | FVIIDR              |
| y5                   | 615.56   | 615.38     | VIIDR               |
| y4                   | 516.46   | 516.31     | IIDR                |
| y3                   | 403.34   | 403.23     | IDR                 |
| y2                   | 290.25   | 290.15     | DR                  |
| y2 -H <sub>2</sub> O | 273.22   | 273.12     | DR                  |
| y1                   | 175.20   | 175.12     | R                   |

**Supplemental Table 12** CID daughter ions of parent ion 1143.48 with structure assignments predicted using program ProteinProspector (<http://prospector.ucsf.edu>). Compound fragment ions were identified by tandem mass spectrometry following the rpHPLC analysis of trypsin cleaved CapD.

**Compound  $m/z$  1143.48**

| $m/z$ | Observed | Calculated | Predicted structure |
|-------|----------|------------|---------------------|
| [M+H] | 1143.48  | 1143.62    | Acetyl-TTHFVIIDR    |
| b8    | 969.78   | 969.50     | Acetyl-TTHFVIID     |
| b7    | 854.72   | 854.48     | Acetyl-TTHFVII      |
| b6    | 741.59   | 741.39     | Acetyl-TTHFVI       |
| b5    | 628.47   | 628.31     | Acetyl-TTHFV        |
| b4    | 529.38   | 529.24     | Acetyl-TTHF         |
| b3    | 382.29   | 382.17     | Acetyl-TTH          |
| b2    | n. d.    | 245.11     | Acetyl-TT           |
| y8    | 1000.85  | 1000.56    | TTHFVIIDR           |
| y7    | 899.78   | 899.51     | HFVIIDR             |
| y6    | 762.68   | 762.45     | FVIIDR              |
| y5    | 615.56   | 615.38     | VIIDR               |
| y4    | 516.45   | 516.31     | IIDR                |
| y3    | n. d.    | 403.23     | IDR                 |
| y2    | 290.25   | 290.15     | DR                  |
| y1    | 175.19   | 175.12     | R                   |

## Supplemental Figures 1-7

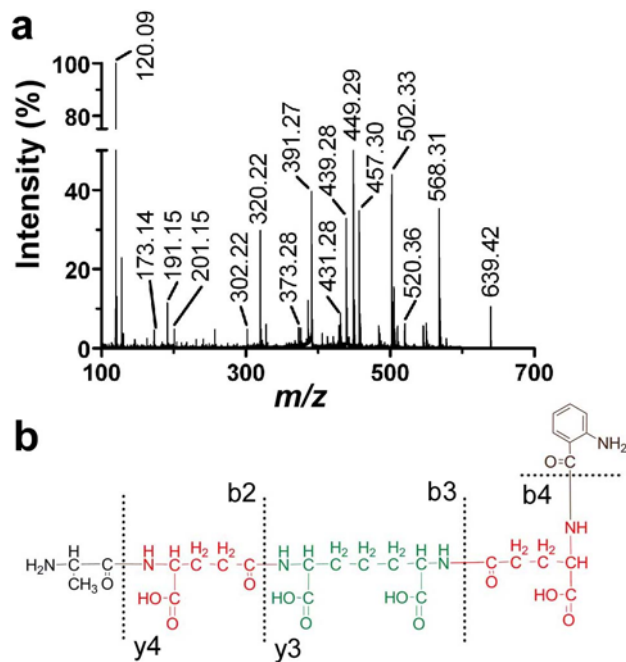

**Supplemental Figure 1** CID-MS/MS analysis of smallest transpeptidase reaction product ion  $m/z$  639.25 (**a**). Identified  $b$ - and  $y$ -ions are indicated on the structural diagram (**b**). The list of daughter ions and corresponding structure predictions is given in **Supplemental Table 3**.

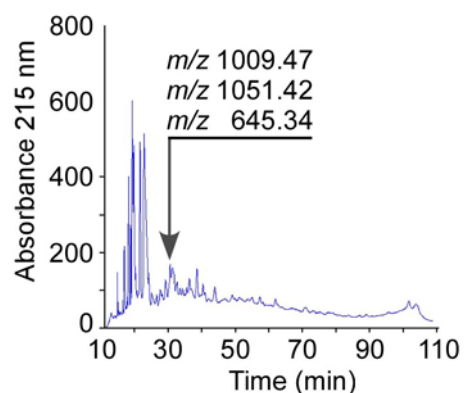

**Supplemental Figure 2** PDGA anchor structures in *B. anthracis* Ames. Isolated murein sacculi of *B. anthracis* Ames were incubated with 5  $\mu$ M CapD (2 hours at 37°C) to degrade capsular material and washed twice with distilled water. Peptidoglycan subunits were cleaved with mutanolysin as described in Material and Methods. Reaction products were separated by rpHPLC on a Hypersil octadecylsilane column using a linear gradient of 5% to 30% (vol/vol) acetonitrile in 0.1% (vol/vol) trifluoroacetic acid over a period of 100 min and elution monitored as absorbance at 215 nm. Fractions were dried under vacuum and compounds were analyzed by MALDI-TOF MS. rpHPLC fractions with retention times between 30 and 32 min contained  $m/z$  1009.47, 1051.53, and 645.34 which were subjected to CID in tandem MS/MS experiments (**Supplemental Tables 4-6**).

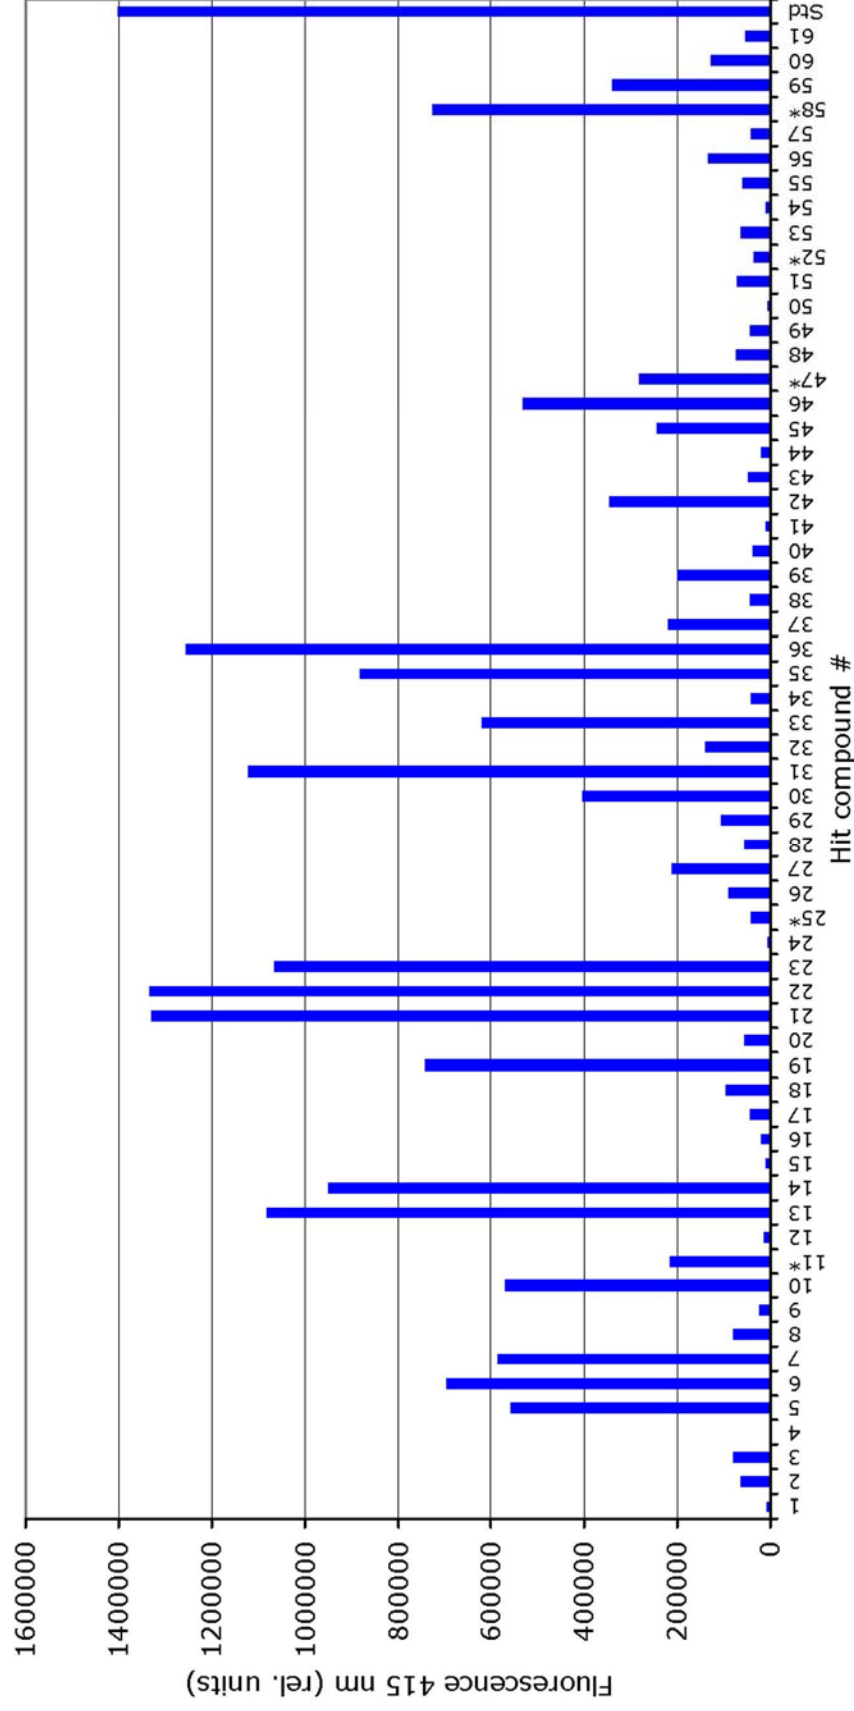

**Supplemental Figure 3** Hit validation for CapD HTS. 61 strong hit compounds were tested using 1 nmol compound in 40- $\mu$ L assay mix containing 20 pmol CapD with 25 mM HEPES-KOH, 01% Tween-20, pH 7.5. After pre-incubation at 22°C for 30 min, 400 pmol substrate was added and incubation continued for 90 min. To determine background fluorescence of compound and substrate combined, a mock assay without CapD was setup for every compound. Fluorescence emission at 415 nm was measured with a FluoroMax-2 (Horiba Jobin Yvon Inc., Edison, NJ). Raw data were normalized by subtracting compound-specific background and values were compared with CapD standard reaction without compound (Std). Compounds that yielded more than 50% reduction in fluorescence were subjected to a secondary screening assay and cheminformatics analysis (see text). As a result, five compounds were identified as *in vitro* CapD inhibitors (marked with asterisk).

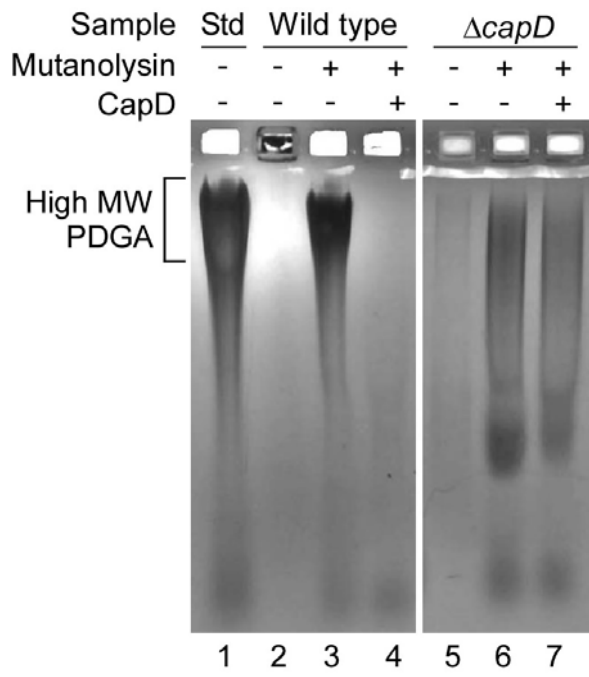

**Supplemental Figure 4** Extraction of cell wall components from *B. anthracis* Ames wild type and  $\Delta capD$  variant. Capsular material was separated by agarose gel (2.5 %) and visualized with methylene blue. Lanes on the agarose gel were loaded as follows; lane 1: purified PDGA served as standard (Std); lanes 2 and 5: insoluble murein sacculi; lanes 3 and 6: material from lanes 2 or 5 treated with mutanolysin; lanes 4 and 7: sample from lane 3 and 6 treated with recombinant CapD.



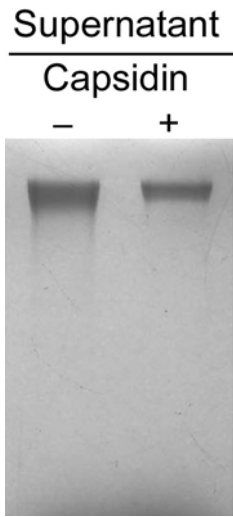

**Supplemental Figure 5** *B. anthracis* Ames cells synthesize and secrete PDGA in the presence of capsidin. Cells were grown in 5% CO<sub>2</sub> atmosphere in absence or presence of 1 mM capsidin (see Fig. 5). The culture supernatant was treated with proteinase K and separated by agarose gel (2.5 %) followed by staining with methylene blue. Sample from supernatant without capsidin (lane 1) and with capsidin (lane 2) contains PDGA.

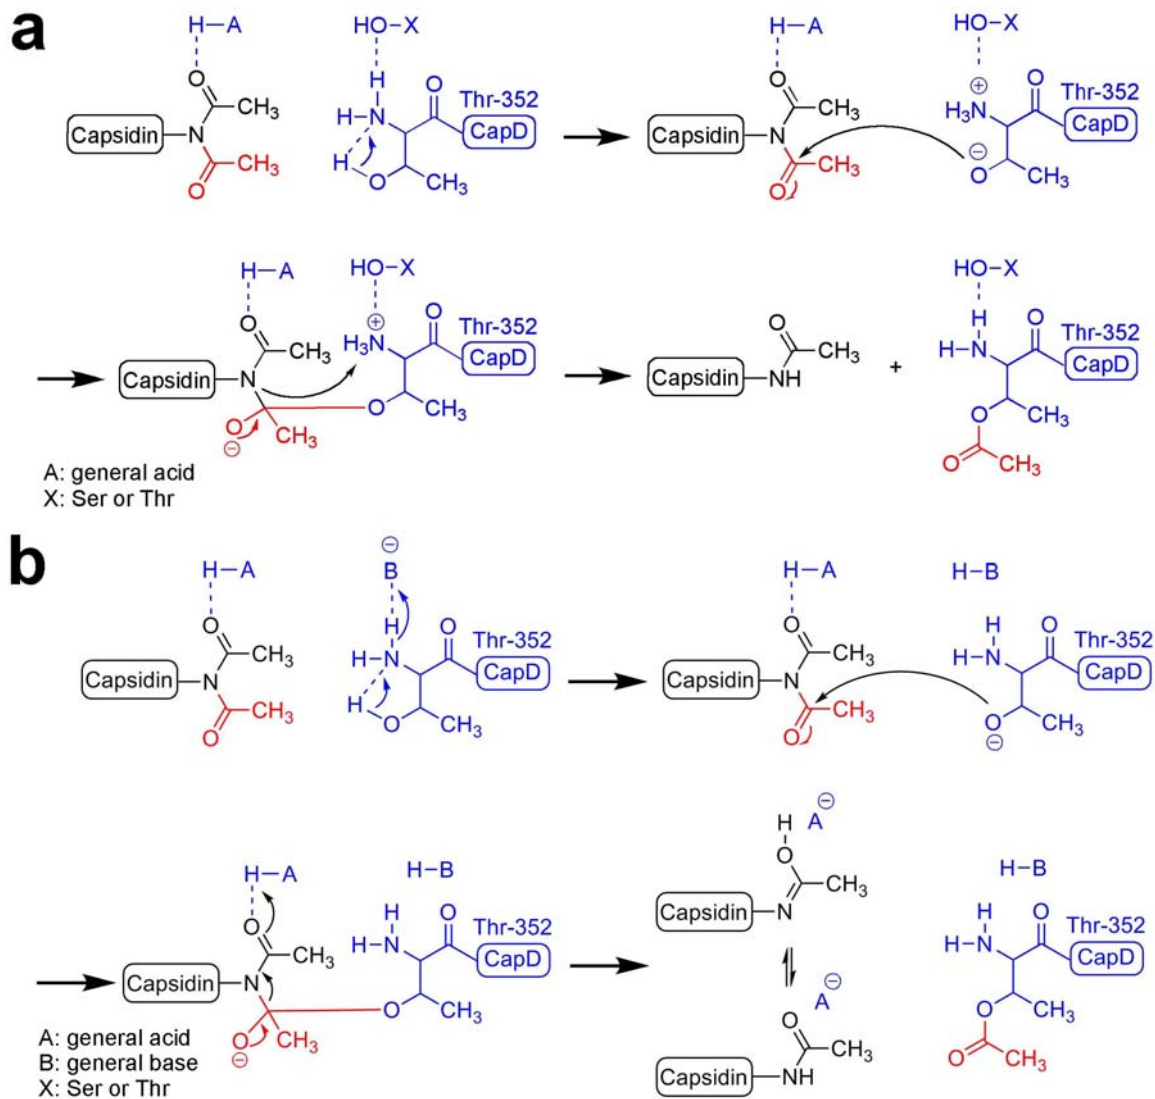

**Supplemental Figure 6** Two possible catalytic mechanisms for inhibition of CapD by capsidin. (a) Nucleophilic oxygen of Thr-352 side chain donates a proton to its  $\alpha$ -amino group. One carbonyl carbon of the diacetyl imide group in capsidin is attacked and forms a negatively charged tetrahedral intermediate. The complex is resolved by moving the proton to the nitrogen in the imide group of the inhibitor. The bond between nitrogen and carbonyl carbon is cleaved and CapD leaves the complex with an acetyl group on the side chain of Thr-352. (b) One proton moves from the nucleophilic oxygen of Thr-352 to a general base and a carbonyl carbon of capsidin is attacked. The tetrahedral intermediate is resolved by interaction with a general acid that moves one proton to the imide group nitrogen of capsidin.

### Control (buffer)

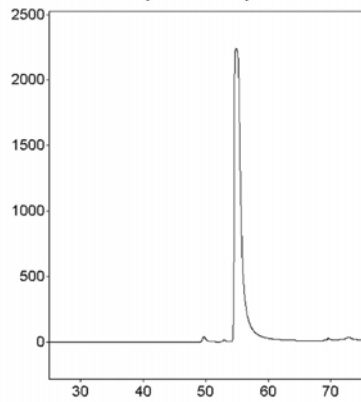

### Serum

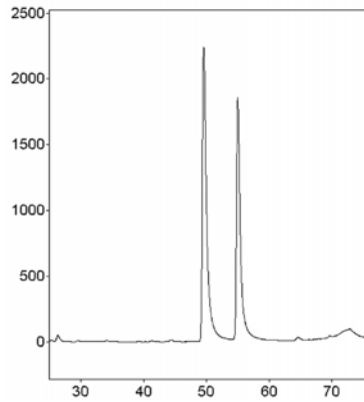

### Blood

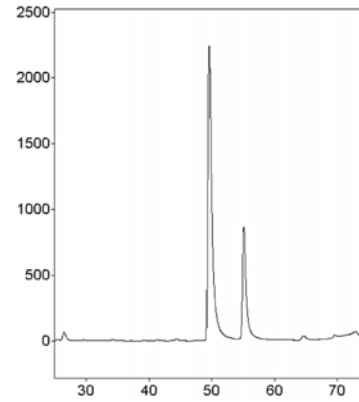

**Supplemental Figure 7** Capsidin (2 mM) was incubated in 1 ml of either Buffer (10 mM HEPES-KOH, 10% glycerol, pH7.5), human serum or blood for 2 hours at 37°C. All samples were filtered and concentrated over a centricon with a cut-off 6,000 Da and submitted to rpHPLC. Products were eluted using a linear gradient of 5-60% acetonitrile (vol/vol) in 0.1% formic acid (vol/vol) over 60 min. Elution profiles were recorded at 215 nm.

## Synthesis of Capsidin (#11) and derivative compounds

### Summary of synthesis for compound #11

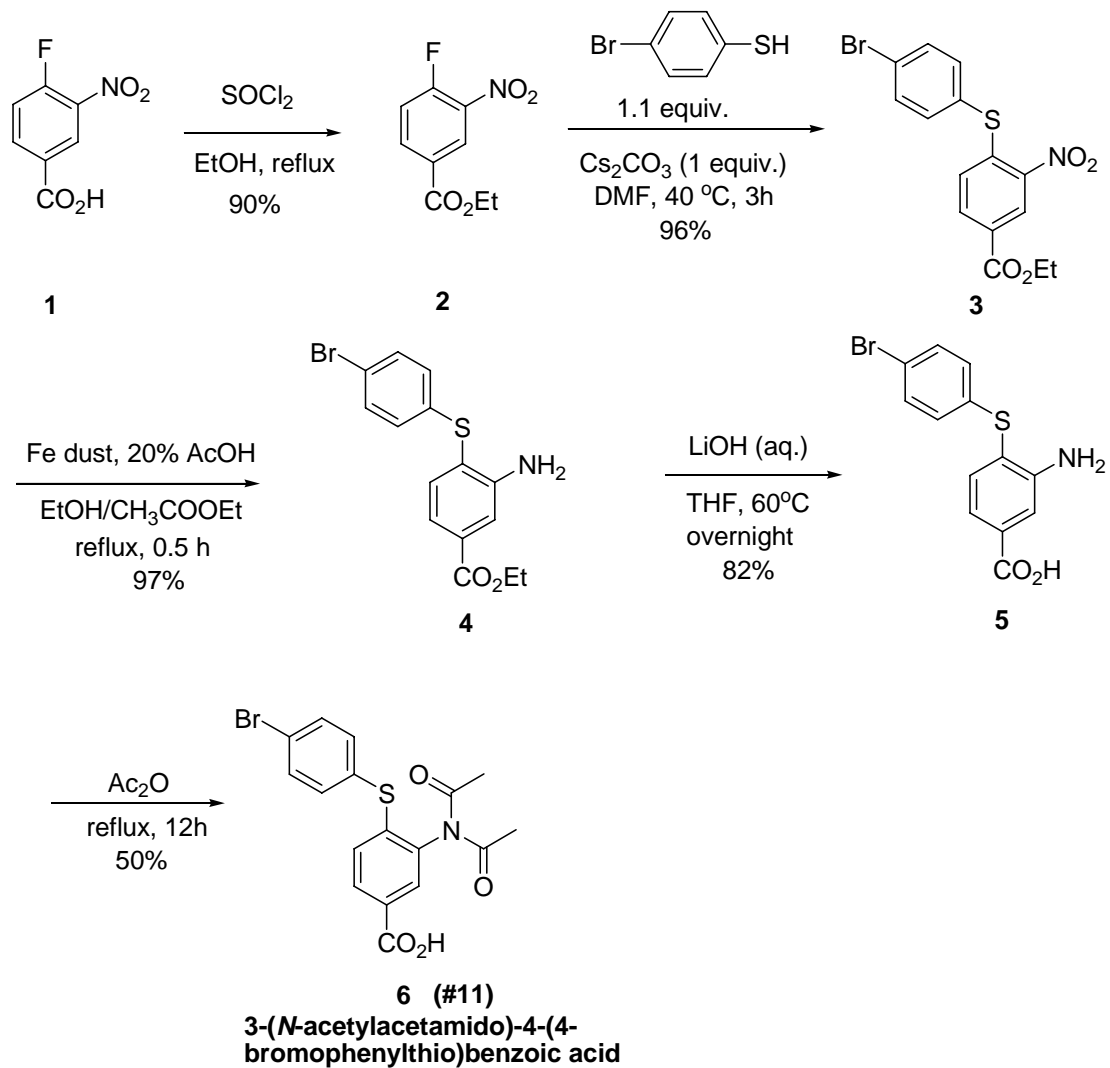

## 1. Synthesis of Ethyl 4-fluoro-3-nitrobenzoate (2)

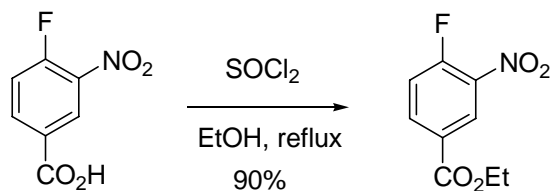

**1**

**2**

To a well-dried three-necked flask under  $\text{N}_2$  were added 1.39g (7.5 mmol) of 4-fluoro-3-nitrobenzoic acid and 15 mL of EtOH. 1.65 mL (22.5 mmol, 3 equiv) of  $\text{SOCl}_2$  were added slowly. After that, the solution was refluxed for 4 hr and stirred at room temperature overnight. Quench the reaction by adding saturated  $\text{NaHCO}_3$  carefully to the reaction at  $0^\circ\text{C}$ . Extracted with EA ( $4 \times 50$  mL), washed by brine, and dried over anhydrous  $\text{MgSO}_4$ . After evaporation, the residue was applied to silicon gel flash chromatography (eluent: Hexanes/ethyl acetate = 5:1) to afford ethyl 4-fluoro-3-nitrobenzoate **2** (1.44g, 90%).

$^1\text{H}$  NMR (500 MHz,  $\text{CDCl}_3$ )  $\delta$  8.80-8.72 (m, 1 H), 8.37-8.25 (m, 1 H), 7.39 (dd,  $J = 10, 8.5$  Hz, 1H), 4.45 (q,  $J = 7.0$  Hz), 1.44 (t,  $J = 7.0$  Hz).

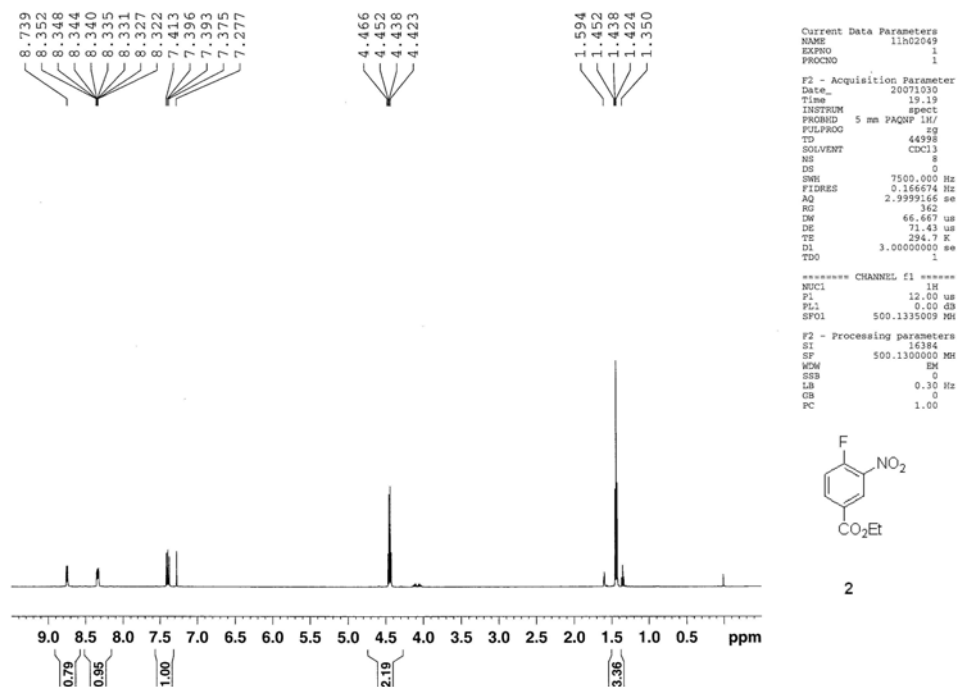

## 2. Synthesis of Ethyl 4-(bromophenylthio)-3-nitrobenzoate (3)

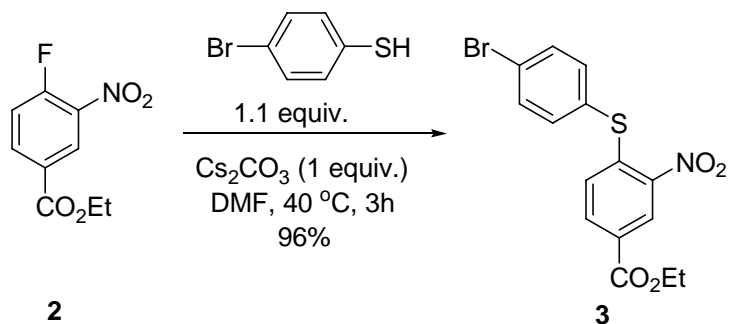

To a solution of compound **2** (1.427g, 6.7 mmol) and 1.1 equiv of 4-Bromobenzene thiol (1.401g, 7.4 mmol) in 20 mL of DMF, were added 2.178g (6.7 mmol, 1 equiv) of CsCO<sub>3</sub> under N<sub>2</sub>. After stirred at 40 °C for 3 hr, the mixture was stirred at rt overnight. The reaction was added water to dissolve the salt and extracted with CH<sub>2</sub>Cl<sub>2</sub>. After dried on MgSO<sub>4</sub>, the organic solvent was evaporated and the residue was purified by silicon gel flash chromatography (eluent: Hexanes/ethyl acetate = 8:1) to afford 2.456g (96%) of yellow solid compound **3**.

<sup>1</sup>H NMR (500 MHz, CDCl<sub>3</sub>) δ 8.86 (d, *J* = 2.0 Hz, 1 H), 7.98 (dd, *J* = 8.5, 2.0 Hz, 1H), 7.66 (d, *J* = 8.5 Hz, 2 H), 7.46 (d, *J* = 8.5 Hz, 2 H), 6.91 (d, *J* = 8.5 Hz, 1 H), 4.40 (q, *J* = 7.0 Hz), 1.40 (t, *J* = 7.0 Hz). <sup>13</sup>C NMR (125 MHz, CDCl<sub>3</sub>) δ 164.2, 144.2, 137.3, 133.6, 133.5, 129.2, 128.0, 127.8, 127.0, 125.4, 61.7, 14.2.

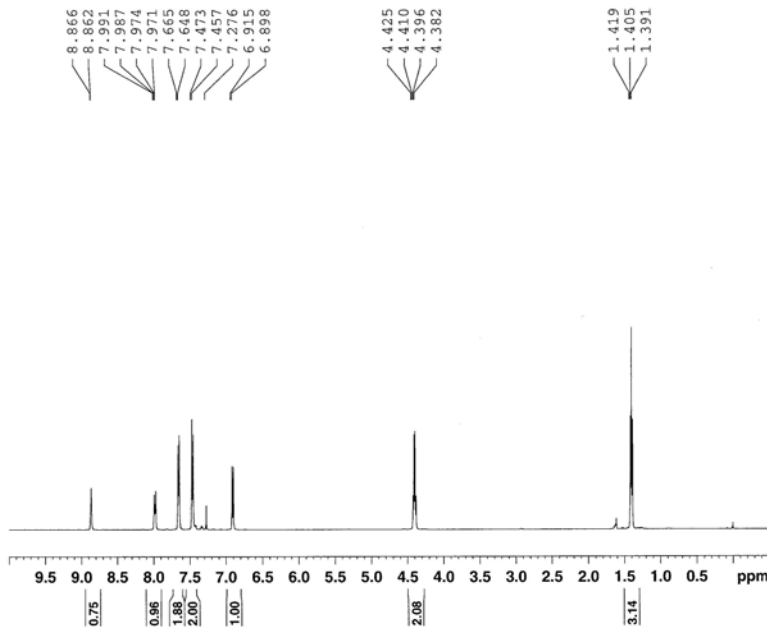

Current Data Parameters  
 NAME 11h02053  
 EXPNO 1  
 PROCNO 1

F2 - Acquisition Parameters:  
 Date\_ 20071101  
 Time 17.54  
 INSTRUM spect  
 PROBHD 5 mm PAQNP 1H/  
 PULPROG zg  
 TD 44998  
 SOLVENT CDCl3  
 NS 8  
 DS 0  
 SWH 7500.000 Hz  
 FIDRES 0.166674 Hz  
 AQ 2.9999166 se  
 RG 161  
 DW 66.667 us  
 DE 71.43 us  
 TE 295.0 K  
 D1 3.00000000 se  
 TDO 1

==== CHANNEL f1 =====  
 NUCL 1H  
 P1 12.00 us  
 PL1 0.00 dB  
 SF01 500.1335009 MHz

F2 - Processing parameters  
 SI 16384  
 SF 500.1300000 MHz  
 WDW EM  
 SSB 0  
 LB 0.30 Hz  
 GB 0  
 PC 1.00

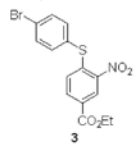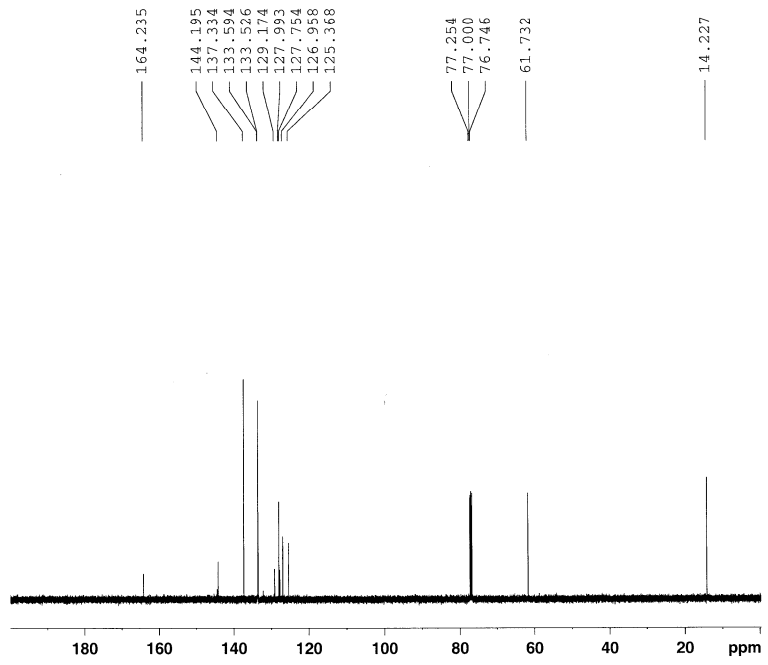

Current Data Parameters  
 NAME 11h02053-c  
 EXPNO 1  
 PROCNO 1

F2 - Acquisition Parameters:  
 Date\_ 20071101  
 Time 18.04  
 INSTRUM spect  
 PROBHD 5 mm PAQNP 1H/  
 PULPROG zgpg30  
 TD 197364  
 SOLVENT CDCl3  
 NS 24  
 DS 4  
 SWH 29761.904 Hz  
 FIDRES 0.110797 Hz  
 AQ 3.3157651 se  
 ME 2050  
 DM 16.800 us  
 DE 6.00 us  
 TE 295.8 K  
 D1 10.00000000 se  
 d11 0.03000000 se  
 DELTA 9.8999962 se  
 TDO 1

==== CHANNEL f1 =====  
 NUCL 13C  
 P1 8.00 us  
 PL1 1.00 dB  
 SF01 125.7716224 MHz

==== CHANNEL f2 =====  
 CPDPRG2 waltz16  
 NUCL 1H  
 PCPD2 80.00 us  
 PL12 16.50 dB  
 PL13 17.00 dB  
 PL2 0.00 dB  
 SF02 500.1325006 MHz

F2 - Processing parameters:  
 SI 131072  
 SF 125.7577945 MHz  
 WDW EM  
 SSB 0  
 LB 0.30 Hz  
 GB 0  
 PC 1.40

### 3. Synthesis of Ethyl 4-(Bromophenylthio)-3-aminobenzoate (**4**)

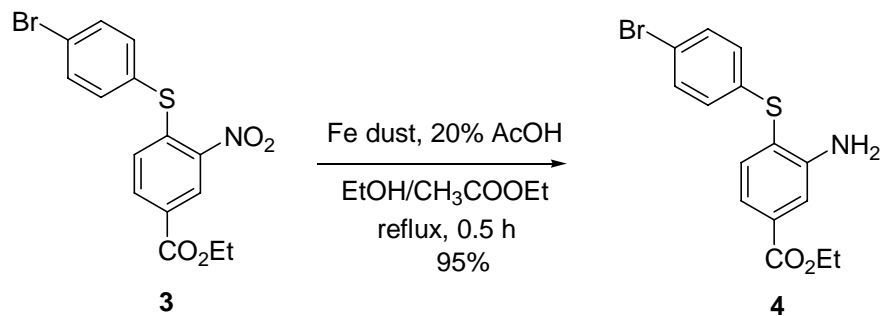

A solution of compound **3** (3.44 g, 9 mmol) in EtOH (10 mL) and ethyl acetate (22 mL) was treated with iron dust (4.055 g, 72 mol) and 20% acetic acid (3 mL) refluxed for 30 min with vigorous stirring. The reaction mixture was diluted with EtOAc (50 mL) and filtered over Celite. The filtrate was washed with 5% aqueous NaHCO<sub>3</sub> (30 mL), followed by water (2 × 30 mL), and dried over anhydrous MgSO<sub>4</sub>. The solvent was evaporated in vacuo and the residue was purified by silicon gel flash chromatography (eluent: Hexanes/EtOAc = 10:1) to afford 3.086g (95%) of compound **4**.

<sup>1</sup>H NMR (500 MHz, CDCl<sub>3</sub>) δ 7.42-7.39 (m, 2 H), 7.38-7.37 (m, 1H), 7.36-7.34 (m, 1 H), 7.13-7.10 (m, 1 H), 7.00-6.96 (m, 2 H), 4.38 (q, *J* = 7.0 Hz, 2 H), 1.04 (t, *J* = 7.0 Hz, 3 H). <sup>13</sup>C NMR (125 MHz, CDCl<sub>3</sub>) δ 166.1, 148.0, 136.3, 134.6, 132.7, 132.0, 128.7, 119.7, 119.2, 119.1, 116.0, 61.0, 14.2.



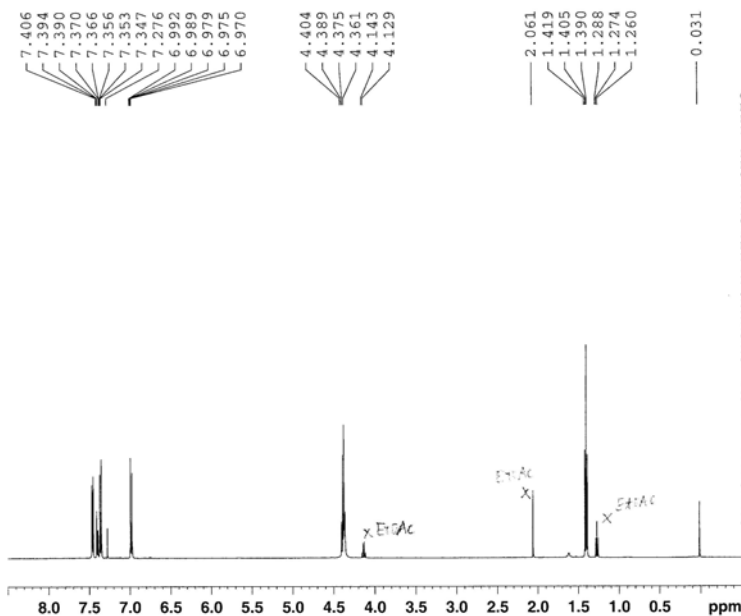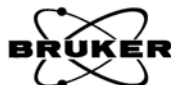

Current Data Parameters  
 NAME 11h02060  
 EXPRO 1  
 PROCNO 1

F2 - Acquisition Parameters  
 Date\_ 20071106  
 Time 18.51  
 INSTRUM spect  
 PROBHD 5 mm PAQNP 1H/  
 PULPROG zg  
 TD 44998  
 SOLVENT CDCl3  
 NS 8  
 DS 0  
 SWH 7500.000 Hz  
 FIDRES 0.166574 Hz  
 AQ 2.9999166 sec  
 RG 203  
 DW 66.667 usec  
 DE 71.43 usec  
 TE 295.0 K  
 D1 3.00000000 sec  
 TDO 1

\*\*\*\*\* CHANNEL f1 \*\*\*\*\*  
 NUC1 1H  
 P1 12.00 usec  
 PL1 0.00 dB  
 SFO1 500.1335009 MHz

F2 - Processing parameters  
 SI 16384  
 SF 500.1300000 MHz  
 WM EM  
 SSB 0  
 LB 0.30 Hz  
 GB 0  
 PC 1.00

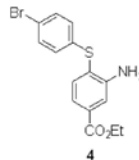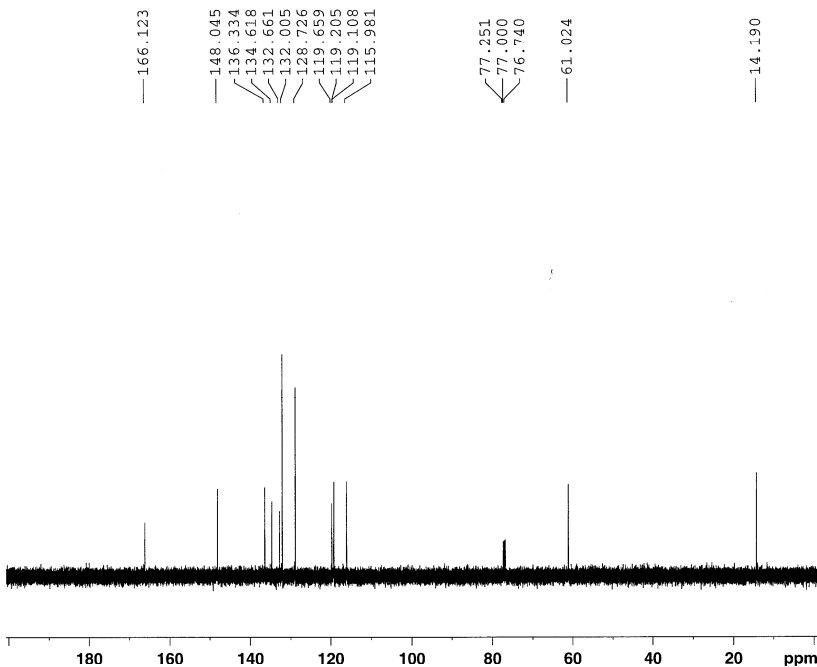

NAME Lu0272C  
 EXPRO 1  
 PROCNO 1  
 Date\_ 20080923  
 Time 11.14  
 INSTRUM spect  
 PROBHD 5 mm PAQNP 1H/  
 PULPROG zgpg30  
 TD 197364  
 SOLVENT cdcl3  
 NS 4  
 DS 4  
 SWH 32894.738 Hz  
 FIDRES 0.166670 Hz  
 AQ 2.9999828 sec  
 RG 2050  
 DW 15.200 usec  
 DE 8.00 usec  
 TE 298.5 K  
 D1 10.00000000 sec  
 D11 0.03000000 sec  
 TDO 1

\*\*\*\*\* CHANNEL f1 \*\*\*\*\*  
 NUC1 13C  
 P1 8.00 usec  
 PL1 1.00 dB  
 PLW 72.42802429 W  
 SFO1 125.7715224 MHz

\*\*\*\*\* CHANNEL f2 \*\*\*\*\*  
 CPDPRG2 waltz16  
 NUC2 1H  
 PCPD2 80.00 usec  
 PL2 0.00 dB  
 PL12 16.50 dB  
 PL13 17.00 dB  
 PLW 24.54113007 W  
 PL1W 0.54940748 W  
 PL1W 0.48965994 W  
 SFO2 500.1125006 MHz  
 SI 121972  
 SF 125.7578090 MHz  
 WM no  
 SSB 0  
 LB 0.00 Hz  
 GB 0  
 PC 1.40

#### 4. Synthesis of 4-(Bromophenylthio)-3-aminobenzoic acid (**5**)

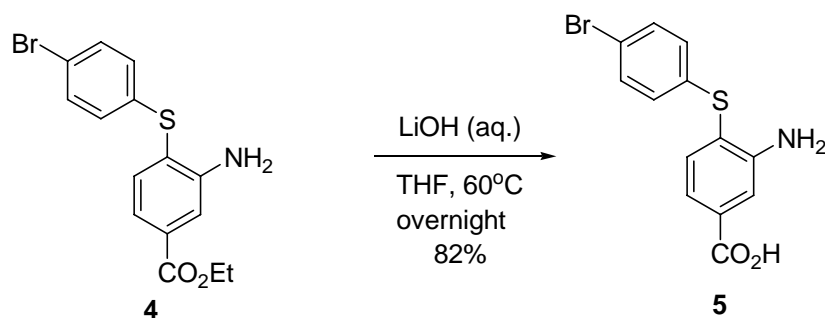

To a 100 mL flask were added 1.1g (3 mmol) of compound **4** in 20 mL of THF. LiOH solution (10mL, 1.0 M in H<sub>2</sub>O) was added and the mixture was stirred at 60 °C overnight. After the reaction was finished, evaporate most of the THF and extracted the residue by ethyl acetate. The aqueous layer was acidified by 2 N HCl to pH 2 and precipitation was formed. Filter to get the solid as the product **5** ( 0.8g, 82%) after washed with water and dried in desiccators.

<sup>1</sup>H NMR (500 MHz, DMSO)  $\delta$  12.89 (bs, 1 H), 7.50-7.46 (m, 2 H), 7.43-7.40 (m, 1H), 7.36 (d,  $J$  = 8.0 Hz, 1 H), 7.14-7.10 (m, 1 H), 7.06-7.01 (m, 2 H), 5.66 (s, 2 H). <sup>13</sup>C NMR (125 MHz, DMSO)  $\delta$  167.9, 150.4, 136.8, 135.8, 133.6, 132.5, 129.7, 119.5, 117.7, 117.4, 116.3.

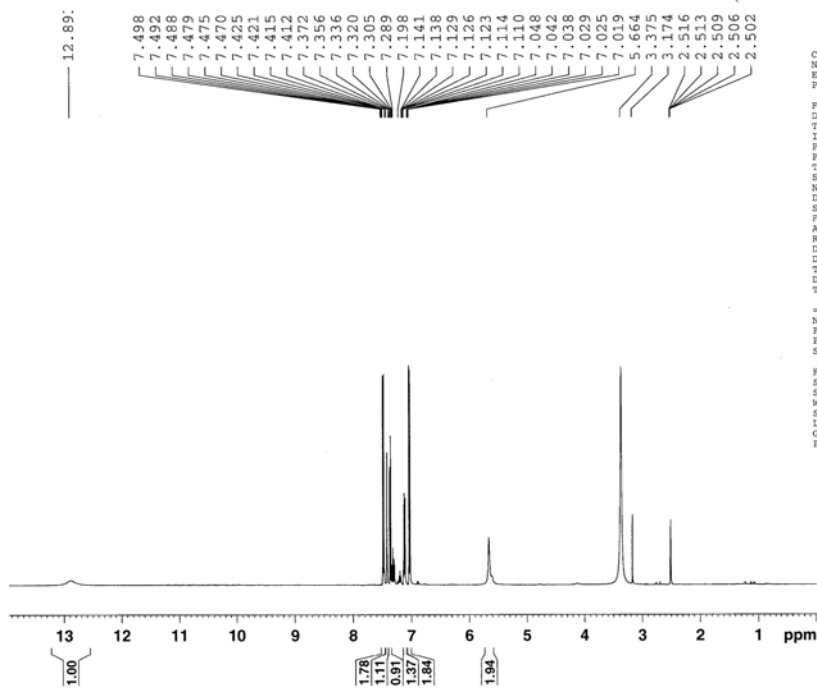

```

Current Data Parameters
NAME      11h0205-3
EXPNO    1
PROCNO   1

F2 - Acquisition Parameter
Date_    20071106
Time     16.02
INSTRUM spect
PROBHD   5 mm PACNP 1H/
PULPROG zg
TD        44998
SOLVENT  DMSO
NS        8
DS        0
SWH       8012.820 Hz
FIDRES   0.178071 Hz
AQ        2.8079232 se
RG        203
DN        62.400 us
DE        71.43 us
TE        295.1 K
D1        3.00000000 se
TD0       1

===== CHANNEL f1 =====
NUC1      1H
P1        12.00 us
PL1       0.00 dB
SFO1     500.1340010 MHz

F2 - Processing parameters
SI        16384
SF        500.1300000 MHz
WDW       EM
SSB       0
LB        0.30 Hz
GB        0
PC        1.00
  
```

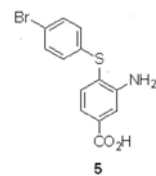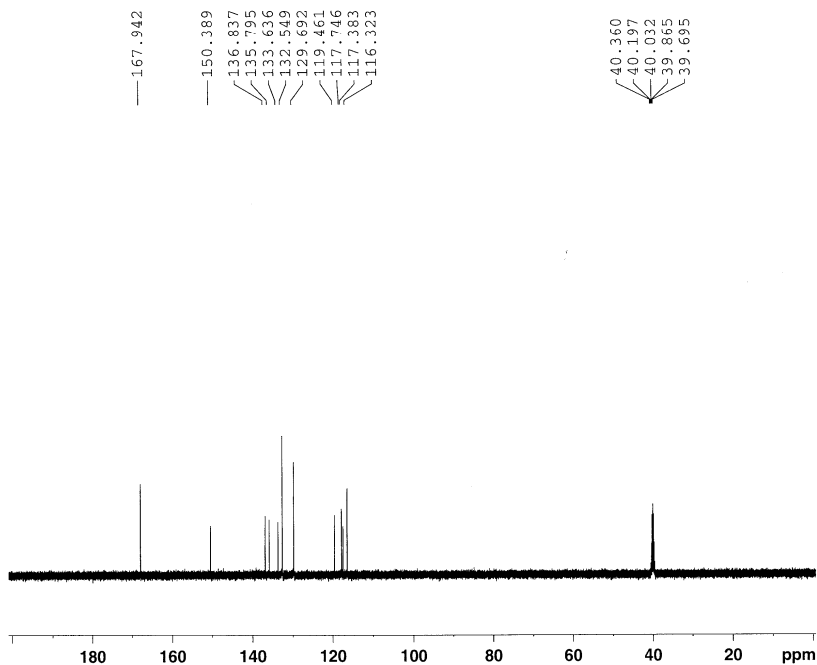

```

NAME      Lu-Dave acidC
EXPNO    1
PROCNO   1
Date_    20080923
Time     11.24
INSTRUM spect
PROBHD   5 mm PACNP 1H/
PULPROG zgpg
TD        197364
SOLVENT  DMSO
NS        16
DS        4
SWH       32894.738 Hz
FIDRES   0.184670 Hz
AQ        2.9999828 sec
RG        2050
DN        15.200 usec
DE        6.00 usec
TE        295.1 K
D1        10.00000000 sec
D11       0.03000000 sec
TD0       1

===== CHANNEL f1 =====
NUC1      13C
P1        8.00 usec
PL1       1.00 dB
SFO1     72.42802429 MHz

===== CHANNEL f2 =====
CFDPRG2  waltz16
NUC2      1H
PCPD2    80.00 usec
PL2      4.00 dB
PL12     16.50 dB
PL13     17.00 dB
PL14     24.54113007 W
PL12W    0.54940748 W
PL14W    0.48965399 W
SFO2     500.1325000 MHz
SI        131072
SF        125.7577716 MHz
WDW       no
SSB       0
LB        0.00 Hz
GB        0
PC        1.40
  
```

### 5. Synthesis of 3-(N-Acetylacetamido)-4-(4-bromophenylthio)benzoic acid (6, #11)

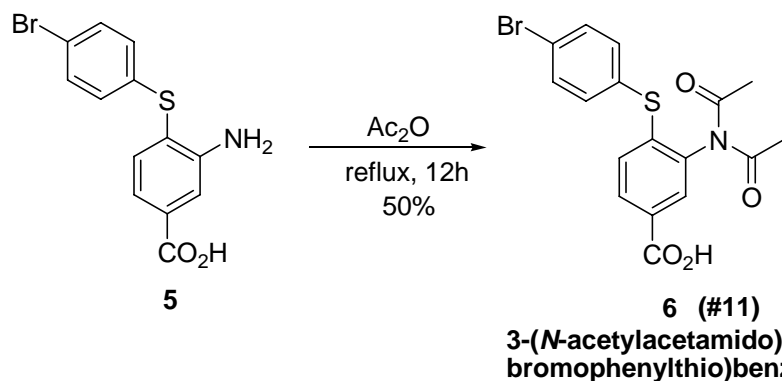

In a 100 mL, round-bottom flask were placed 30 mL of acetic anhydride and 0.8 g (2.5 mmol) of compound **5**. The solution was refluxed for 12 h, then most of the acetic anhydride was removed by distillation. The residue was diluted with water, washed by  $\text{CH}_2\text{Cl}_2$ , and 30 mL of brine, and dried over anhydrous  $\text{MgSO}_4$ . The solution was concentrated and applied to silicon gel column to afford 3-(N-acetylacetamido)-4-(4-bromophenylthio)benzoic acid **6** (0.505 g, 50%) as a solid.  $^1\text{H}$  NMR (500 MHz, DMSO)  $\delta$  13.80-12.50 (bs, 1H), 7.94 (d,  $J = 2.0$  Hz, 1 H), 7.88 (dd,  $J = 8.5$ , 2.0 Hz, 1H), 7.70 (d,  $J = 8.5$  Hz, 2 H), 7.46 (d,  $J = 8.5$  Hz, 2 H), 7.06 (d,  $J = 8.0$  Hz, 1 H), 2.23 (s, 6 H).  $^{13}\text{C}$  NMR (125 MHz, DMSO)  $\delta$  172.3, 166.7, 143.0, 137.5, 136.6, 133.6, 131.6, 130.9, 130.6, 129.9, 129.1, 123.8, 26.8. MS (ESI)  $m/z$  407.9 [ $\text{M}_{\text{Br}}^{81}$ ] $^+$ ; 405.9 [ $\text{M}_{\text{Br}}^{79}$ ] $^+$ .

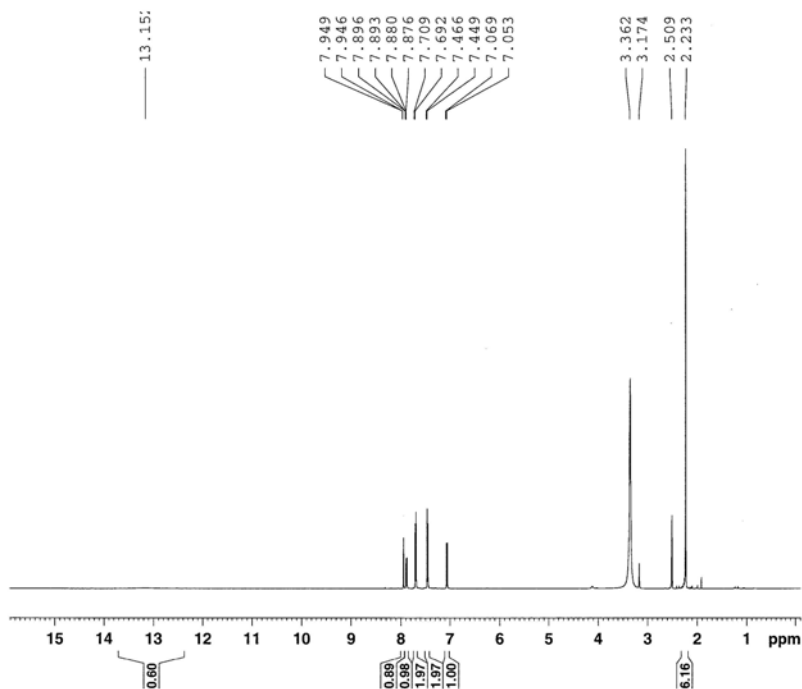

Current Data Parameters  
 NAME 1182071  
 EXPNO 1  
 PROCNO 1  
 F2 - Acquisition Parameters  
 Date\_ 20071112  
 Time 10.28  
 INSTRUM spect  
 PROBHD 5 mm PAQNP 1H/  
 PULPROG zgpg  
 TD 44998  
 SOLVENT DMSO  
 NS 8  
 DS 4  
 SWH 8012.820 Hz  
 FIDRES 0.138071 Hz  
 AQ 2.8079252 sec  
 RG 362  
 DW 62.400 usec  
 DE 7.43 usec  
 TE 295.0 K  
 D1 3.00000000 sec  
 TDO 1

\*\*\*\*\* CHANNEL f1 \*\*\*\*\*  
 NUC1 1H  
 P1 12.00 usec  
 PL1 0.00 dB  
 SFO1 500.1339510 MHz  
 F2 - Processing parameters  
 SI 16384  
 SF 500.1300000 MHz  
 NS 8  
 SSB 0  
 LB 0.30 Hz  
 GB 0  
 PC 1.00

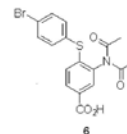

3-(N-acetylamido)-4-(4-bromophenylthio)benzoic acid

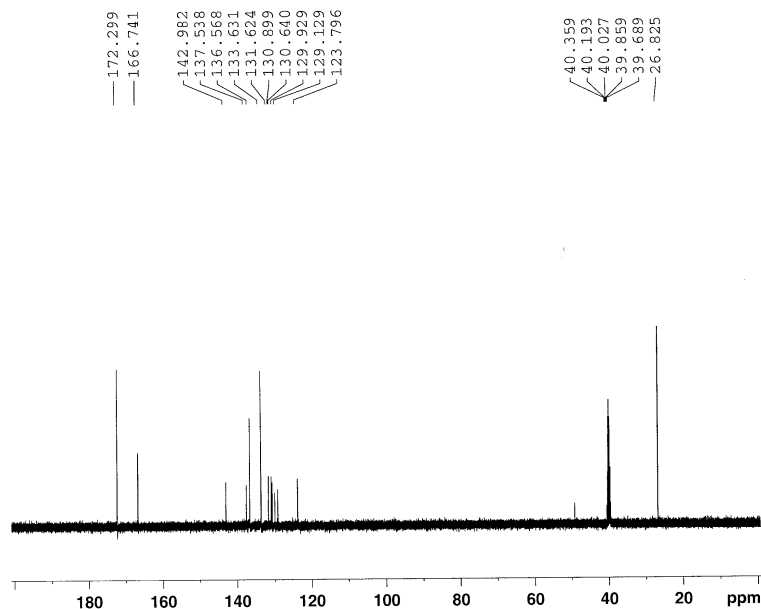

NAME Lu#11-C  
 EXPNO 3  
 PROCNO 1  
 Date\_ 20080922  
 Time 20.16  
 INSTRUM spect  
 PROBHD 5 mm PAQNP 1H/  
 PULPROG zgpg  
 TD 197364  
 SOLVENT DMSO  
 NS 12  
 DS 4  
 SWH 32894.738 Hz  
 FIDRES 0.166670 Hz  
 AQ 2.9999828 sec  
 RG 2050  
 DW 15.200 usec  
 DE 6.00 usec  
 TE 298.0 K  
 D1 10.0000000 sec  
 D11 0.03000000 sec  
 TDO 1

\*\*\*\*\* CHANNEL f1 \*\*\*\*\*  
 NUC1 13C  
 P1 8.00 usec  
 PL1 1.00 dB  
 PL1W 72.42802429 W  
 SFO1 125.7716224 MHz

\*\*\*\*\* CHANNEL f2 \*\*\*\*\*  
 CPDPRG2 waltz16  
 NUC2 1H  
 PCPD2 80.00 usec  
 PL2 0.00 dB  
 PL12 16.50 dB  
 PL13 17.00 dB  
 PL2W 24.54113007 W  
 PL12W 0.54961718 W  
 PL13W 0.48965994 W  
 SFO2 500.1325006 MHz  
 SI 131072  
 SF 125.7577770 MHz  
 MDW rc  
 SSB 0  
 LB 0.00 Hz  
 GB 0  
 PC 1.40

## Synthesis for compound #11-2

### 6. Synthesis of 3-Acetamido-4-(4-bromophenylthio)benzoic acid (7, #11-2)

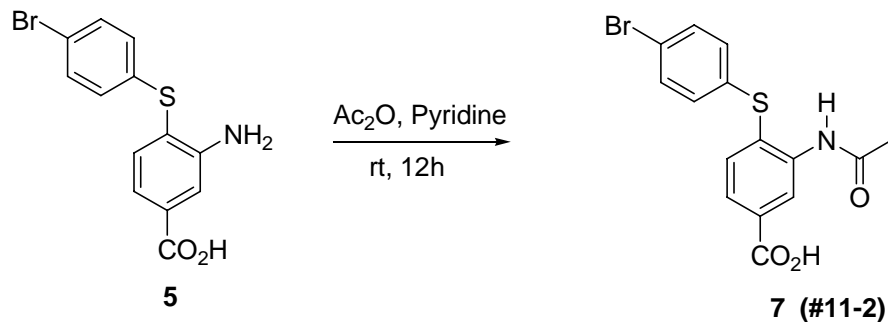

#### 3-acetamido-4-(4-bromophenylthio)benzoic acid

In a 50 mL flask were dissolved 1.2 g (3.7 mmol) of compound **5**, 3 mL of acetic anhydride in 7 mL of pyridine. The solution was stirred at rt overnight. After remove most of the solvent, the residue was diluted by 20 mL of CH<sub>2</sub>Cl<sub>2</sub>, washed by water and dried on anhydrous MgSO<sub>4</sub>. After evaporation, the residue was purified by column and afforded 456 mg (50%) of product **7**.

<sup>1</sup>H NMR (500 MHz, DMSO)  $\delta$  13.80-12.60 (bs, 1H), 9.70 (s, 1 H), 8.04 (s, 1H), 7.69 (dd,  $J = 8.5$ , 2.0 Hz, 1 H), 7.61 (d,  $J = 8.5$  Hz, 2 H), 7.29 (d,  $J = 8.5$  Hz, 2 H), 7.21 (d,  $J = 8.5$  Hz, 1 H), 2.03 (s, 3 H). <sup>13</sup>C NMR (125 MHz, DMSO)  $\delta$  169.5, 167.2, 137.5, 135.8, 134.2, 133.5, 133.2, 131.6, 130.7, 127.4, 127.2, 122.1, 23.8. MS (ESI)  $m/z$  365.9 [ $M_{Br}^{81}$ ]<sup>+</sup>; 363.9 [ $M_{Br}^{79}$ ]<sup>+</sup>.

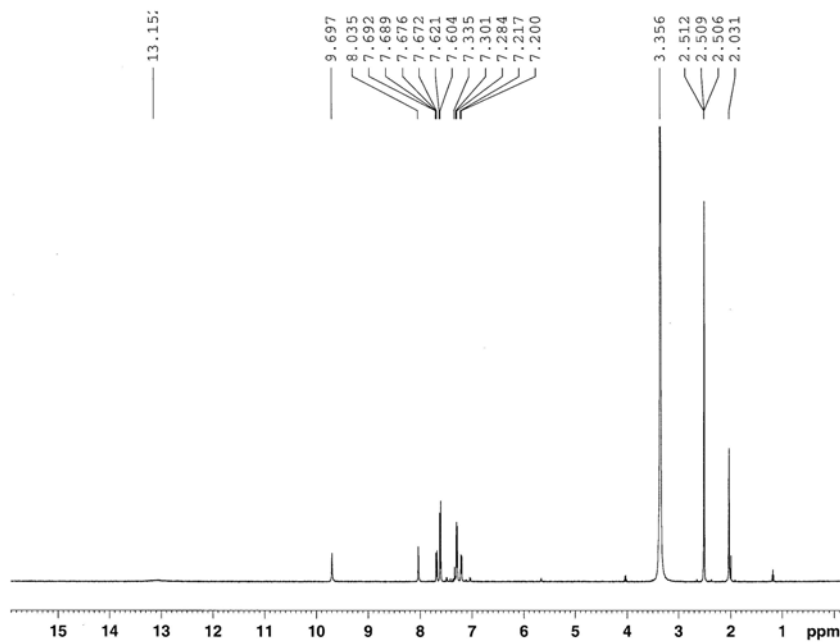

```

Current Data Parameters
NAME      13802070-2
EXPNO    1
PROCNO   1

F1 - Acquisition Parameters
Date_    20071112
Time     10.34
INSTRUM  spect
PROBHD   5 mm PAQNP 1H/
PULPROG  zgpg30
TD        65536
SOLVENT  DMSO
NS        8
DS        4
SWE       8012.828
FIDRES   0.178013
AQ        2.8079212
RG        515
DW        61.480
DE        71.43
TE        298.0
DQ        3.0000000
TDO      1

***** CHANNEL F1 *****
NUC1      1H
P1        12.00
PL1       0.00
SFO1      500.1339500

F2 - Processing parameters
SI        16384
SF        500.1339500
WDW       0
SSB       0
LB        0.30
GB        0
PC        1.00
  
```

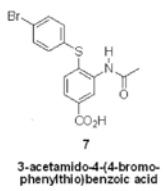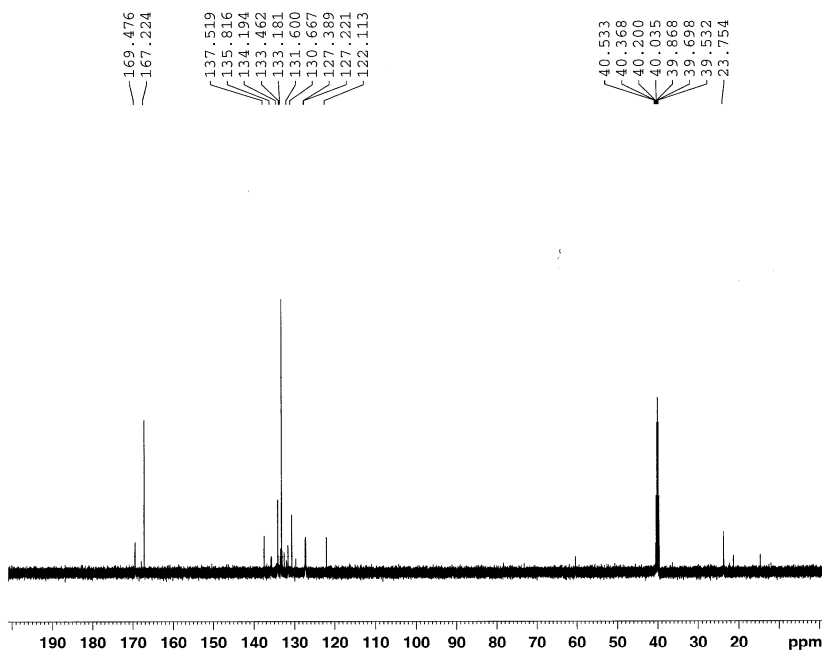

```

NAME      Lu#11-2C2
EXPNO    3
PROCNO   1
DATE_    20080923
Time     11.34
INSTRUM  spect
PROBHD   5 mm PAQNP 1H/
PULPROG  zgpg30
TD        197364
SOLVENT  DMSO
NS        20
DS        4
SWE       32894.738
FIDRES   0.166670
AQ        2.9999628
RG        2950
DW        15.200
DE        6.00
TE        298.5
DQ        10.0000000
D11      0.0300000
TDO      1

***** CHANNEL F1 *****
NUC1      13C
P1        8.00
PL1       1.00
SFO1      72.42802429

***** CHANNEL F2 *****
CPDPRG2  waltz16
NUC2      1H
PCPD2    80.00
PL2      0.00
SFO2     16.50
PL3      17.00
PCDPRG   24.54113007
PL12W    0.54940748
PL13W    0.48955994
SFO2     500.1325006
SI        131072
SF        125.7577706
WDW       dc
SSB       0
LB        0.00
GB        0
PC        1.40
  
```

## Summary of synthesis for compound #11-1

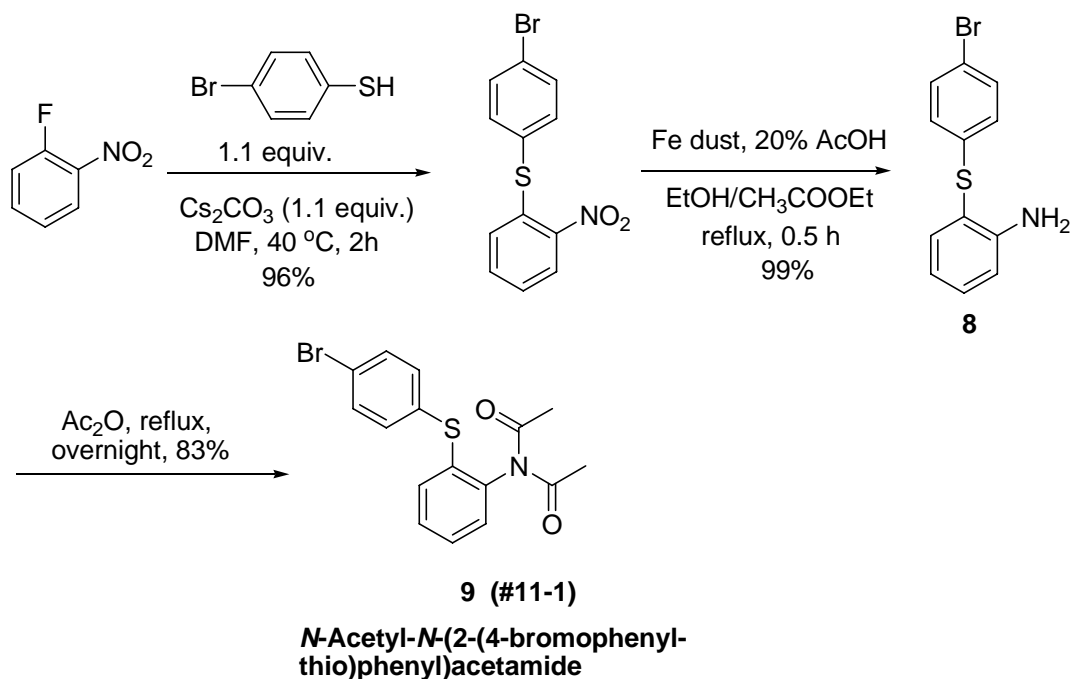

## 7. Synthesis of N-Acetyl-N-(2-(4-bromophenylthio)phenyl)acetamide (9, #11-1)

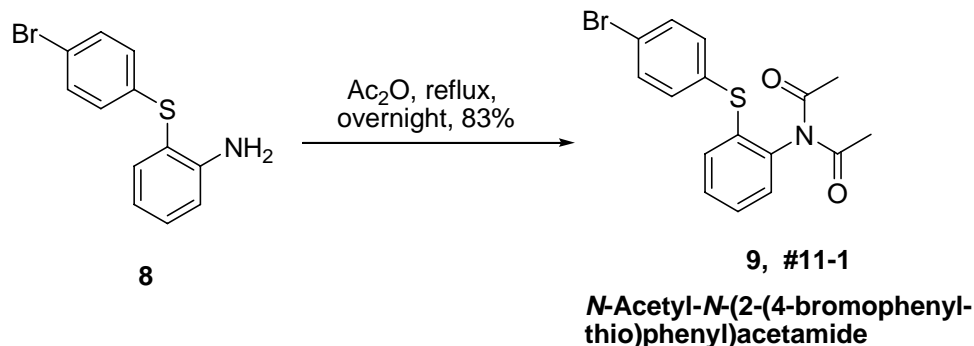

Compound **8** 2-(4-bromophenylthio)benzenamine was synthesized following the above steps same as compound **4**. In a 100 mL, round-bottom flask were placed 30 mL of acetic anhydride and 1.37 (5 mmol) of **8**. The solution was refluxed for 12 h, then most of the acetic anhydride was removed by distillation. The residue was diluted with water, washed by CH<sub>2</sub>Cl<sub>2</sub>, and 30 mL of brine, and dried over anhydrous MgSO<sub>4</sub>. The solution was concentrated and applied to silicon gel column and afforded 51.368 g (83%) of final product **9** N-Acetyl-N-(2-(4-bromophenylthio)phenyl)acetamide as a solid.

<sup>1</sup>H NMR (400 MHz, CDCl<sub>3</sub>) δ 7.49 (d, *J* = 8.4 Hz, 2 H), 7.35-7.31 (m, 2H), 7.29 (d, *J* = 8.4 Hz, 2 H), 7.20-7.15 (m, 2 H), 2.30 (s, 6 H). <sup>13</sup>C NMR (125 MHz, CDCl<sub>3</sub>) δ 172.3, 138.1, 136.3,



134.4, 132.5, 131.5, 131.1, 129.8, 129.6, 128.1, 122.6, 26.3. MS (ESI)  $m/z$  366.0  $[M_{Br}^{81}+H]^+$ ; 364.0  $[M_{Br}^{79}+H]^+$ .

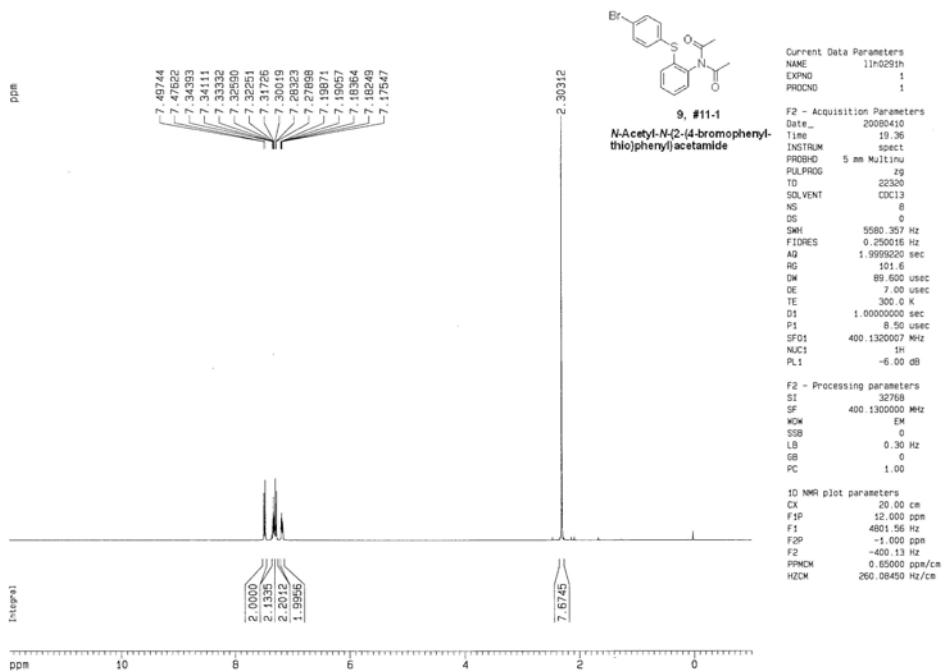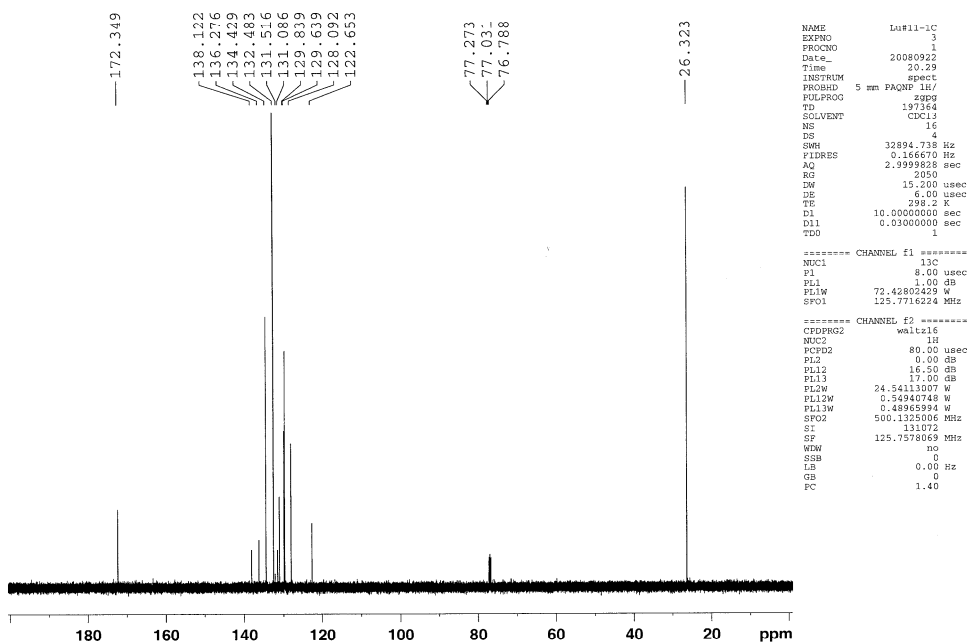

Supplement: NIHMS152248-supplement-Suppl_Fig_1-7__Tab_1-12.pdf [file NIHMS152248-supplement-Suppl_Fig_1-7__Tab_1-12.pdf]
